# Supplementary material
Source: publisher site journal article supplement (https://www.spandidos-publications.com/4143/downloadSupplementary)
Supplement: Supplementary file 2 [file downloadSupplementary]

## Sheet: Feuil1
Table SII. List and distribution of activating mutations observed.
Nucleotide variant	Exon	Protein variant	Total number of patients	Number of lung cancer	Number of colon cancer	Number of melanoma	Number of GIST
BRAF
c.770A>G	6	p.Gln257Arg	1	1
c.1391G>T	11	p.Gly464Val	1	1
c.1405G>A	11	p.Gly469Arg	4	2	1	1
c.1405G>C	11	p.Gly469Arg	1	1
c.1406G>C	11	p.Gly469Ala	6	4	1	1
c.1406G>T	11	p.Gly469Val	5	5
c.1447A>G	11	p.Lys483Glu	5	2	2	1
c.1454T>G	11	p.Leu485Trp	1	1
c.1457_1471delATGTGACAGCACCTA	11	p.Asn486_Pro490del	2			2
c.1497A>C	12	p.Lys499Asn	1		1
c.1789C>G	15	p.Leu597Val	1	1
c.1790T>A	15	p.Leu597Gln	1		1
c.1790T>G	15	p.Leu597Arg	1	1
c.1794_1796dupTAC	15	p.Thr599dup	1			1
c.1798G>A	15	p.Val600Met	4			4
c.1798_1799delGTinsAA	15	p.Val600Lys	6			6
c.1799T>A	15	p.Val600Glu	172	35	94	43
c/1799_1800delinsAA	15	p.Val600Glu	1			1
c.1801A>G	15	p.Lys601Glu	3		2	1
c.2191C>T	18	p.Pro731Ser	1		1
EGFR
c.664C>T	6	p.Arg222Cys	1		1
c.866C>T	7	p.Ala289Val	2	2
c.2065G>C	18	p.Val689Leu	1	1
c.2125G>A	18	p.Glu709Lys	1	1
c.2126A>G	18	p.Glu709Gly	1	1
c.2155G>T	18	p.Gly719Cys	3	3
c.2156G>C	18	p.Gly719Ala	3	3
c.2214_2215insAAAATTCCCGTCGCTATC	19	p.Ile740_Lys745dup	1	1
c.2232_2249delinsAAA	19	p.Glu746_Ala750del	18	18
c.2232_2254del	19	p.Glu746_Ser752delinsAla	1	1
c.2235_2249delGGAATTAAGAGAAGC	19	p.Glu746_Ala750del	27	27
c.2236_2244delGAATTAAGA	19	p.Glu746_Arg748del	2	2
c.2236_2250delGAATTAAGAGAAGCA	19	p.Glu746_Ala750del	8	8
c.2237_2254delAATTAAGAGAAGCAACAT	19	p.Glu746_Ser752delinsVal	4	4
c.2238_2249delATTAAGAGAAGC	19	p.Leu747_Ala750del	2	2
c.2238_2252delATTAAGAGAAGCAAC	19	p.Leu747_Thr751del	5	5
c.2239T>G	19	p.Leu747Val	1		1
c.2239_2248delinsC	19	p.Leu747_Ala750delinsPro	2	2
c.2239_2252delinsCA	19	p.Leu747_Thr751delinsGln	1	1
c.2239_2264delinsGCCAA	19	p.Leu747_Ala755delinsAlaAsn	1	1
c.2240_2254del	19	p.Leu747_Thr751del	1	1
c.2240_2257delTAAGAGAAGCAACATCTC	19	p.Leu747_Pro753delins	5	5
c.2253_2276delATCTCCGAAAGCCAACAAGGAAAT	19	p.Ser752_Ile759del	1	1
c.2255C>T	19	p.Ser752Phe	3	3
c.2270A>T	19	p.Lys757Met	1	1
c.2299G>A	20	p.Ala767Thr	1	1
c.2300_2301insCAGCGTGGA	20	p.Ser768_Asp770dup	2	2
c.2300_2308dupCCAGCGTGG	20	p.Ala767_Val769dup	4	4
c.2301_2302insAGCGTA	20	p.Ser768_Val769dup	1	1
c.2302_2303insGCGTGGACAACCCCC	20	p.Pro772_His773insArgValAspAsnPro	1	1
c.2303G>A	20	p.Ser768Asn	2	2
c.2303G>T	20	p.Ser768Ile	2	2
c.2305G>A	20	p.Val769Met	2		2
c.2308_2309insACAACCCCC	20	p.Asn771_His773dup	1	1
c.2308_2309insGTT	20	p.Asp770delinsGlyTyr	1	1
c.2309_2310insCAACCCCGG	20	p.Pro772_His773insGlyAsnPro	2	2
c.2310_2311insGGC	20	p.Asp770_Asn771insGly	2	2
c.2310_2311insGGT	20	p.Asp770_Asn771insGly	1	1
c.2320G>A	20	p.Val774Met	1	1
c.2326_2327delinsTC	20	p.Arg776Ser	1	1
c.2369C>T	20	p.Thr790Met	10	9	1
c.2386G>A	20	p.Gly796Ser	1	1
c.2390G>C	20	p.Cys797Ser	1	1
c.2572C>A	21	p.Leu858Met	1	1
c.2572_2573delinsAG	21	p.Leu858Arg	1	1
c.2573T>A	21	p.Leu858Gln	1	1
c.2573T>G	21	p.Leu858Arg	57	56	1
c.2582T>A	21	p.Leu861Gln	7	7
c.2582T>G	21	p.Leu861Arg	2	2
c.2612C>A	21	p.Ala871Glu	1	1
ERBB2
c.929C>T	8	p.Ser310Phe	6	3	3
c.1466C>T	12	p.Pro489Leu	9	3	6
c.2033G>A	17	p.Arg678Gln	5		5
c.2180G>C	18	p.Gly727Ala	1	1
c.2264T>C	19	p.Leu755Ser	1		1
c.2305G>T	19	p.Asp769Tyr	2		2
c.2310_2311insGCATACGTGATG	20	p.Glu770_Ala771insAlaTyrValMet	1	1
c.2314_2325dupTACGTGATGGCT	20	p.Tyr772_Ala775dup	1	1
c.2313_2324dupATACGTGATGGC	20	p.Ala775_Gly776insTyrValMetAla	5	5
c.2325_2326insTCCGTGATGGCT	20	p.Ala775_Gly776insSerValMetAla	1	1
c.2326_2327insTAT	20	p.Gly776delinsValCys	1	1
c.2329G>T	20	p.Val777Leu	1		1
c.2331_2332insTGT	20	p.Val777_Gly778insCys	2	2
c.2521C>G	21	p.Leu841Val	1		1
c.2524G>A	21	p.Val842Ile	5		5
KIT
c.1253_1255delACG	8	p.(Asp419del)	1				1
c.1504_1509dupGCCTAT	9	p.Ala502_Tyr503dup	1				1
c.1648-2_1672delAGAAACCCATGTATGAAGTACAGTGGA	11	p.Lys550_Lys558del	1				1
c.1649_1675delAACCCATGTATGAAGTACAGTGGAAGG	11	p.Lys550_Val559delinsIle	1				1
c.1654_1671delATGTATGAAGTACAGTGG	11	p.Met552_Trp557del	1				1
c.1655_1675delTGTATGAAGTACAGTGGAAGG	11	p.Met552_Val559delinsIle	1				1
c.1657_1683delGTATGAAGTACAGTGGAAGGTTGTTGA	11	p.Tyr553_Glu561del	1				1
c.1660_1665delGAAGTA	11	p.Glu554_Val555del	1				1
c.1662_1688delAGTACAGTGGAAGGTTGTTGAGGAGAT	11	p.Val555_Ile563del	1				1
c.1669T>A	11	p.Trp557Arg	2				2
c.1669T>G	11	p.Trp557Gly	1			1
c.1669_1683delAGTGGAAGGTTGTTG	11	p.Trp557_Glu561del	1		1
c.1669_1725delTGGAAGGTTGTTGAGGAGATAAATGGAAACAATTATGTTTACATAGACCCAACACAA	11	p.Trp557_Gln575del	1				1
c.1673_1693delAGGTTGTTGAGGAGATAAATG	11	p.Lys558_Gly565delinsArg	1				1
c.1676T>C	11	p.Val559Ala	2				2
c.1676T>G	11	p.Val559Gly	3				3
c.1679_1681delTTG	11	p.Val560del	4				4
c.1679_1720delTTGAGGAGATAAATGGAAACAATTATGTTTACATAGACCCAA	11	p.Val560_Thr574delinsAla	1				1
c.1679T>A	11	p.Val560Asp	1				1
c.1698_1699insG+c.1701_1728delTTATGTTTACATAGACCCAACACAACTT	11	p.Asn567_Leu576delinsGlu	1				1
c.1700_1726delATTATGTTTACATAGACCCAACACAAC	11	p.Asn567_Leu576delinsIle	2				2
c.1727T>C	11	p.Leu576Pro	5			4	1
c.1733_1735del	11	p.Asp579del	1	1
c.1735_1737delGAT	11	p.Asp579del	1				1
c.2009C>T	14	p.Thr670Ile	1				1
c.2380G>A	17	p.Ala794Thr	1	1
c.2458G>T	17	p.Asp820Tyr	1				1
KRAS
c.27_29dupTGG	2	p.Gly10dup	1		1
c.34G>A	2	p.Gly12Ser	27	9	17	1
c.34G>C	2	p.Gly12Arg	8	5	2		1
c.34G>T	2	p.Gly12Cys	195	160	34	1
c.35G>A	2	p.Gly12Asp	175	64	111
c.35G>C	2	p.Gly12Ala	257	226	31
c.35G>T	2	p.Gly12Val	160	86	72	2
c.37G>C	2	p.Gly13Arg	4	1	3
c.37G>T	2	p.Gly13Cys	16	15	1
c.38G>A	2	p.Gly13Asp	73	12	61
c.38_39delinsAA	2	p.Gly13Glu	1	1
c.38_39delinsTT	2	p.Gly13Val	1		1
c.40G>A	2	p.Val14Ile	1		1
c.57G>C	2	p.Leu19Phe	4	2	2
c.64C>A	2	p.Gln22Lys	3	1	2
c.91G>A	2	p.Glu31Lys	2	2
c.175G>A	3	p.Ala59Thr	1		1
c.176C>G	3	p.Ala59Gly	1		1
c.179G>A	3	p.Gly60Asp	1			1
c.181C>A	3	p.Gln61Lys	9	5	4
c.182A>G	3	p.Gln61Arg	10	4	4	2
c.182A>T	3	p.Gln61Leu	3	3
c.183A>C	3	p.Gln61His	25	15	9	1
c.183A>T	3	p.Gln61His	12	7	4	1
c.351A>T	4	p.Lys117Asn	6	2	4
c.436G>A	4	p.Ala146Thr	23	2	21
c.436G>C	4	p.Ala146Pro	4		4
c.437C>T	4	p.Ala146Val	10	5	5
MAP2K1
c.158T>C	2	p.Phe53Ser	1			1
c.167A>C	2	p.Gln56Pro	2		2
c.169A>G	2	p.Lys57Glu	1		1
c.171G>T	2	p.Lys57Asn	7	6	1
c.199G>A	2	p.Asp67Asn	2		2
c.302_307delTGGAGA	3	p.Glu102_Ile103del	1	1
c.305A>G	3	p.Glu102Gly	1	1
c.362G>C	3	p.Cys121Ser	1		1
c.370C>T	3	p.Pro124Ser	1			1
c.371C>T	3	p.Pro124Leu	1			1
c.607G>A	6	p.Glu203Lys	2	1	1
MET
c.2942-38_2945del	14	Splicing site	1	1
c.2942-36_2945-5del	14	Splicing site	1	1
c.2942-19_2946delTCTTTCTCTCTGTTTTAAGATCTG	14	Splicing site	1	1
c.2942-18_2942-6delCTTTCTCTCTGTT	14	Splicing site	1	1
c.2942-18_2942-9delCTTTCTCTCT	14	Splicing site	2	2
c.2942-18_2952delCTTTCTCTCTGTTTTAAGATCTGGGCAGT	14	Splicing site	1	1
c.2942-15_2942-1delTCTCTCTGTTTTAAG	14	Splicing site	2	2
c.2942-11_2942-2delTCTGTTTTAA	14	Splicing site	1	1
c.2942-7_2942-2delTTTTAA	14	Splicing site	1	1
c.2942-6_2942-1delTTTAAG	14	Splicing site	1	1
c.2942-6_2958delTTTAAGATCTGGGCAGTGAATTA	14	Splicing site	2	2
c.2942-2A>C	14	Splicing site	1	1
c.2942-1G>A	14	Splicing site	1	1
c.3079_3082+3delGAAGGTA	14	Splicing site	1	1
c.3080_3082+12delAAGGTATATTTCAGT	14	Splicing site	1		1
c.3082G>A	14	Splicing site	4	4
c.3082G>C	14	Splicing site	3	3
c.3082G>T	14	Splicing site	1	1
c.3082+1G>A	14	Splicing site	3	3
c.3082+2T>C	14	Splicing site	5	5
c.3082+3A>G	14	Splicing site	1	1
c.3082+3A>T	14	Splicing site	1	1
c.3082+8T>G	14	Splicing site	1	1
c.3328G>A	16	p.Val1110Ile	1	1
c.3334C>T	16	p.His1112Tyr	1			1
c.3446T>C	17	p.Met1149Thr	1	1
NRAS
c.34G>A	2	p.Gly12Ser	1		1
c.34G>T	2	p.Gly12Cys	3	1	1	1
c.35G>A	2	p.Gly12Asp	14	3	9	2
c.35G>C	2	p.Gly12Ala	2	1	1
c.35G>T	2	p.Gly12Val	2	1	1
c.37G>C	2	p.Gly13Arg	3		2	1
c.38G>T	2	p.Gly13Val	1		1
c.181C>A	3	p.Gln61Lys	22	3	8	11
c.182A>G	3	p.Gln61Arg	22	5	2	15
c.182A>T	3	p.Gln61Leu	17	3	4	10
c.183A>C	3	p.Gln61His	2	2
c.183A>T	3	p.Gln61His	1			1
c.272C>T	3	p.Ala91Val	1			1
PDGFRA
c.1607T>A	11	p.Val536Glu	1				1
c.1682T>A	12	p.Val561Asp	1		1
c.1697_1711delGCCCAGATGGACATG	12	p.Ser566_Glu571delinsLys	1				1
c.2525A>T	18	p.Asp842Val	1				1
c.2525_2527delACA	18	p.Asp842_Ile843delinsVal	1				1
GIST = Gastrointestinal Stromal Tumors
